1 ***Escherichia coli* Bacteriuria in pregnant women in Ghana: Antibiotic resistance pattern,**  
2 **Virulence Factors and Resistant genetic markers.**

3

4 Forson Obeng Akua<sup>1\*</sup>, Wilson Bright<sup>1</sup>, David Nana-Adjei <sup>1</sup>, Marjorie Ntiwaa Quarchie<sup>1</sup>, Noah  
5 Obeng-Nkuramah<sup>1</sup>

6

7 <sup>1</sup>Department of Medical Laboratory Science, School of Biomedical and Allied Health Sciences,  
8 College of Health Sciences, University of Ghana, Legon, Accra, Ghana.

9

10 \*Contact: +233541937023

11 E-mail: asobeng@ug.edu.gh

12

13

14

15

16

17

18

19

20

21

22

23

24

25

26

27

28

29

30

31

32

33

34

35

36

37

38

39

40

41

42

43

## 44 **Abstract**

45 The relevance of *Escherichia coli* associated bacteriuria infection in pregnant women is poorly  
46 understood, despite these strains sharing a similar virulence profile with other extra intestinal  
47 pathogenic *E. coli* producing severe obstetric and neonatal infections. We characterized and  
48 determined the antimicrobial susceptibility, resistant genes and virulence profiles of 82 *E. coli*  
49 isolates associated with asymptomatic bacteriuria in some pregnant in five very distinct  
50 hospitals in the Volta region from January, 2016 to April, 2016 using Kirby-Bauer disc  
51 diffusion and polymerase chain reaction.

52 High levels of antimicrobial resistance was observed to Ampicillin (79.3%), Tetracycline  
53 (70.7%) and Cotrimoxazole (59.8%), except for Cefuroxime (32.9%). Resistant genes analyses  
54 revealed 58.5% were positive for *Bla*<sub>TEM</sub> and 14.6% for *aph(3)-Ia*(aphA2). Virulence factors  
55 (VFs) was more widespread in pregnant women in the 2<sup>nd</sup> and 3<sup>rd</sup> trimesters than 1<sup>st</sup> trimester.  
56 VFs relating to adhesion (*papC* and *iha*), Protectins (*traT*), aerobactin acquisition (*iutA*) and  
57 iron acquisition systems (*fyuA* and *irp2*) were more prevalent in the resistant *E. coli* isolates.  
58 This study provides additional evidence for a link in bacteriuria and transmission of extra-  
59 intestinal *E. coli* in pregnant women to cause multi-resistant severe obstetric or neonatal  
60 infections. Considering the involvement of extra-intestinal *E. coli* in infections, our results may  
61 be helpful to develop strategies to prevent maternal and/ neonatal infections. In addition  
62 continuous surveillance is required to guide appropriate antibiotic usage in pregnant women.

63

64 **Keywords:** *Escherichia coli*, bacteriuria, pregnant women, Ghana

65

66

67

68

69

70

71

## 72 **Introduction**

73 Maternal genitourinary infection is a leading cause of pregnancy complications worldwide [1].  
74 In the last decades, the rod shaped gram-negative lactose fermenter and gas producing member  
75 of the family *Enterobacteriaceae* called *Escherichia coli* is reported to be a major cause of UTI  
76 in pregnancy [2, 3]. There are many pathotypes of *E. coli*, but the pathotype associated with  
77 extra intestinal infection is called extra intestinal pathogenic *Escherichia coli* (ExPEC) [4, 5,  
78 6]. ExPEC are characterized by the presence of large numbers of specialized virulent factors  
79 (VFs) that enable them to become invasive, adhesive, and resistant to bactericidal drugs or  
80 resistant to phagocytosis in the host [7, 8]. ExPEC lack the ability to cause gastroenteritis in  
81 humans [7, 9], however, they are able to cause extra-intestinal infections involving sepsis,  
82 meningitis, cellulitis, osteomyelitis, wounds infections and urinary tract [9, 10, 11].  
83 ExPEC infections are common causes of healthcare-associated infection in recent years with a  
84 large number reported to be associated with bacteriuria, bacteraemia and urosepsis [12-15].  
85 Urinary tracts infections (UTI) is treatable, however, it is becoming increasingly difficult to  
86 control because of rampant antimicrobial resistance to pregnancy friendly antibiotics,  
87 especially those belonging to the beta lactam class, cephalosporins and fluoroquinolones [13,  
88 16, 17]. Although the prevalence of antimicrobial resistance in *E. coli* in pregnant women has  
89 been found to vary in India, Iraq, and Ethiopia [18, 19, 20, 21]. In Ghana, some hospitals have  
90 reported *E. coli* as one of the pathogens associated with bacteriuria and bacteraemia [22, 23,  
91 24]. However, characterization of virulence factors and genetic properties of the associated  
92 pathogenic isolates are limited to basic phenotypic tests leaving several important questions  
93 unanswered on the implicated *E. coli* strain (s) infection and its propensity to cause other extra  
94 intestinal infection in patients. Hence the need for this study to evaluate the antibiotic resistance  
95 phenotypes, and virulence factor genes of ExPEC isolates from pregnant women with  
96 asymptomatic bacteriuria from randomly selected hospitals in the Volta region of Ghana.

## 97 **Materials and methods**

### 98 **Study location**

99 The Volta region is one of the administrative regions in Ghana with Ho as its capital. It lies  
100 east of the Volta Lake and about 20570 km<sup>2</sup> [25]. The Volta regional hospital, Ho serves as a  
101 referral center for the Volta region in Ghana and also to some West African countries. There is  
102 an infection control unit in the hospital which supervises and coordinates hygienic practices to  
103 prevent and control outbreaks of multi-resistant pathogenic infections. The Volta region is  
104 bordered to the east by the Republic of Togo, to the south by the Atlantic Ocean and to the  
105 north by the Northern region of Ghana. Ghana has a population of about 24.2 million and is  
106 considered a lower middle income economy [30]. Health facilities available in the bacteriology  
107 laboratory of regional hospitals in Ghana permit only phenotypic characterization of bacteria  
108 and the most common organisms reported in the laboratories are *Escherichia coli*,  
109 *Staphylococcus aureus* and *Pseudomonas aeruginosa* [26]. *Escherichia coli* isolated in the  
110 Bacteriology Laboratory of the hospitals are not routinely tested for virulence factors or  
111 sequenced to detect the sequence type complex [27].

### 112 **Subject selection and data collection**

113 Pregnant women attending antenatal clinic at the selected hospitals were only included in the  
114 study. Consenting women were then given written detailed information about the study and a  
115 written informed consent form to complete. A self-administered questionnaire was given to the  
116 women to obtain information on the demographic and socio-economic characteristics (see S1  
117 File for Copy of Questionnaire). All information about the study was translated verbally in the  
118 native languages for those who could not read. Participants who could not write were also  
119 assisted to fill the consent forms. Non pregnant and pregnant women who were on antibiotic  
120 treatment were excluded from the study. The sample size was calculated using the formula;

121  $N=Z^2P(1-P)/D^2$  where; N= sample size; Z= 1.96 (95% confidence interval), P = 56.5%, D=  
122 0.05 T

## 123 **Microbiological analysis**

124 Clean catch midstream urine samples from the pregnant women were inoculated onto cysteine  
125 lactose electrolyte deficient (CLED) agar and incubated at 37°C for 18 to 24 hours. Colonies  
126 that appeared circular and yellow on CLED agar were considered to be potential *E. coli* [28].  
127 A representative colony on each plate was Gram stained and further tested using indole, methyl  
128 red, citrate, Voges-Proskauer test and urease [28]. API 20E identification system (bioMerieux  
129 SA, Marcy l'Etoile, France) was used to confirm the isolates before the identified isolates were  
130 stored in 10% glycerol-trypticase soy broth at -70°C for further sensitivity and molecular  
131 analyses testing.

## 132 **Antimicrobial susceptibility testing**

133 The antimicrobial susceptibility testing was carried out on the isolates using the Kirby Bauer  
134 method based on the CLSI, (29) guidelines for resistance to Ampicillin (10µg), Tetracycline  
135 (30µg), Cotrimoxazole (25µg), Nalidixic acid (30µg), Nitrofurantoin (300µg, Gentamicin  
136 (10µg) and Cefuroxime (30µg).

137 The control strains used for the determination of minimum inhibitory concentrations were *E.*  
138 *faecalis* ATCC 29212, *E. coli* ATCC 25922, *Pseudomonas aeruginosa* ATCC 27853 and  
139 *Staphylococcus aureus* ATCC 29213. The bacteria were subcultured onto 5% horse blood agar  
140 (HBA) plates (37°C, 18 h) and then suspended in saline to a concentration equivalent to 0.5  
141 Mcfarland. A loopful of the suspensions was transferred to a Mueller-Hinton agar plate and a  
142 sterile cotton swab was used to streak the entire surface of the plate. The lid of the agar plate  
143 was left ajar for 3 - 5 min to allow for excess surface moisture to be absorbed before the  
144 application of drug impregnated disks and incubated at 24°C for 24 hr. After incubation, zone

145 diameters around the antibiotic discs was measured and classified as sensitive or resistant based  
146 on the CLSI [29] break points (Table 1).

147

148

149 **Table 1** Guidelines for interpreting antimicrobial susceptibility results

|                      | Zone diameter (mm) |           |
|----------------------|--------------------|-----------|
|                      | Susceptible        | Resistant |
| Ampicillin (10)      | ≥17                | ≤13       |
| Tetracycline (30)    | ≥15                | ≤11       |
| Cotrimoxazole (25)   | ≥16                | ≤10       |
| Nalidixic acid (30)  | ≥19                | ≤13       |
| Nitrofurantoin (300) | ≥17                | ≤14       |
| Gentamycin (10)      | ≥15                | ≤12       |
| Cefuroxime (3)       | ≥23                | ≤14       |

150

151

152

153

154

155

156

157

158

159

160

161

162

163

## 164 **DNA extraction**

165 A single colony of a fresh bacterial culture from 5% HBA was picked and suspended in 200  
166 ml of sterile water. Tubes were heated at 98°C for 10 min and subsequently centrifuged at 17  
167 900 X g for 5 min. The supernatant were recovered and 2 ml of this was used as a template in  
168 the various polymerase chain reactions (PCR).

## 169 **Molecular Analysis of *E. coli* isolates**

170 A total of 82 *E. coli* isolates recovered from the pregnant women from the five hospitals in the  
171 Volta region of Ghana between February, 2016 to August, 2016 were analysed for virulence  
172 factors (Vfs) with PCR for the presence of genes encoding 18 VFs (30, 31). The following  
173 genes: adhesins (*papC*, *papG*, including *papG* alleles, *sfa/foc*, *iha*, *hra* and *ibeA*), toxins (*hlyC*,  
174 *cnf1* and *sat*), iron capture systems (*fyuA*, *irp2*, *iroN*, *iucC* and *ireA*), protectins (*neuC*,  
175 chromosomal *ompT* and *traT*) and *usp*, a gene encoding uropathogenic-specific protein were  
176 tested using primers (Integrated DNA Technologies, Inc, USA - <https://www.idtdna.com>) in  
177 Table 2.

178 Each reaction consisted of 4 mM MgCl<sub>2</sub>, 1 ml of 25 pmol of each primer, 2 ml of 2 mM dNTPs  
179 and 4 ml of 5 X PCR buffer, 1U of Taq DNA polymerase (New England BioLab, South Africa)  
180 in a total reaction volume of 25 ml, including 2 ml DNA template. Six primer pools utilised  
181 were; pool 1: *iron* (665), *sfa* (410), *iutA* (300), *hra* (260), pool 2: *papA* (717), *KpsMTIII* (392),  
182 *ireA* (254), *ibeA* (171); pool 3: *papG1* (1190), *papGII*, III (1070), *iha* (827), *ompT* (559),  
183 *KpsMTII* (272); pool4: *iucC* (541), *Cnf1* (498), *irp2* (287); pool 5: *hlyD* (904), *usp* (440), *traT*  
184 (290); and pool 6 : *papC* (200), *sat* (937), *FyuA* (880).

185 The cycling condition were as follows: 94 °C for 5 min, followed by 30 cycles of denaturation  
186 (94 °C, 30 s), annealing (64°C, 30 s), extension (68°C, 3 min) and final extension (72°C, 10  
187 min). PCR products were then electrophoresed on 1.5% agarose gel containing ethidium  
188 bromide.

**Table 2** Primers used for PCR.

| Category                       | Primer                    | Primer Sequence (5'-3')   |                           | Amplicon Size (bp) | Annealing Temp. (°C) | Reference     |
|--------------------------------|---------------------------|---------------------------|---------------------------|--------------------|----------------------|---------------|
|                                |                           | Forward                   | Reverse                   |                    |                      |               |
| Antibiotic resistant genes     | <i>Bla</i> <sub>TEM</sub> | gagtattcaacatttctgt       | accaatgcttaatcagtg        | 857                | 64                   | [32]          |
|                                | <i>Int 1</i>              | gggtcaaggatctggatttcg     | acatgggtgtaaatcatcgtc     | 483                | 64                   | [33]          |
|                                | <i>Int 2</i>              | cacggatatgcgacaaaaaggt    | gtagcaaacgagtgacgaaatg    | 788                | 64                   | [33]          |
|                                | <i>Aph(3')-Ia(aphA1)</i>  | atgggctcgcgataatg         | ctcaccgagcagttccat        | 600                | 64                   | [32]          |
|                                | <i>Aph(3')-Ia(aphA2)</i>  | gaacaagatggattgcacgc      | gctctcagcaatatcacgg       | 680                | 64                   | [32]          |
| Adhesins                       | <i>papA</i>               | atggcagtggtgttttggtg      | cgtcccaccatactgctcttc     | 717                | 64                   | [6]           |
|                                | <i>papC</i>               | gtggcagtatgagtaatgaccgtta | atatacttctcagggatgcaata   | 200                | 64                   | [6]           |
|                                | <i>papG I</i>             | ctgtaattacggaagtgatttctg  | tccagaatagctcatgtaaccg    | 1190               | 64                   | [6]           |
|                                | <i>papGII, III</i>        | ctgtaattacggaagtgatttctg  | actatccggctccgataaacctat  | 1070               | 64                   | [6]           |
|                                | <i>sfa/foc</i>            | ctccggagaactgggtgcattctac | cggaggagtaattacaaacctggca | 410                | 64                   | [6]           |
|                                | <i>iha</i>                | ctggcggaggctc tgagatca    | tccttaagctc ccgcgctga     | 827                | 64                   | [34]          |
|                                | <i>hra</i>                | cagaaaacaaccggtatcag      | accaagcatgatgcatgac       | 260                | 64                   | [37]          |
|                                | <i>ibeA</i>               | aggcaggtgtgcgccgcgtac     | tggtgctccggcaaacatgc      | 171                | 64                   | [6]           |
| Toxins                         | <i>hlyD</i>               | ctccggtactgaaaaggac       | gcctgattactgaagcctg       | 904                | 64                   | *             |
|                                | <i>cnfI</i>               | aagatggagtttctatgaggag    | cattcagagtcctgcctcattatt  | 498                | 64                   | [6]<br>[35] 8 |
|                                | <i>sat</i>                | gcagctaccgcaataggaggt     | cattcagagtaccggggccta     | 937                | 64                   |               |
| Iron capture systems           | <i>fyuA</i>               | tgattaacccgcgacgggaa      | cgcagtaggcacgatgttga      | 880                | 64                   | [6]           |
|                                | <i>irp2</i>               | aaggattcgtgttaccggac      | tcgtcgggcagcgtttctct      | 287                | 64                   | [38]          |
|                                | <i>iron</i>               | aagtcaaagcaggggtgcccc     | gacccgacattaag acgcag     | 665                | 64                   | [34]          |
|                                | <i>iuC</i>                | cgccgtggctgggtaag         | cagccggtcaccaagtatcactg   | 541                | 64                   | [36]          |
|                                | <i>ireA</i>               | gatgactcagccacgggtaa      | ccaggactcacctcacgaat      | 254                | 64                   | *             |
| Protectins                     | <i>kpsMTII</i>            | gcgcatttgctgatactgtt      | catccagacgataagcatgagca   | 272                | 64                   | [6]           |
|                                | <i>kpsMTIII</i>           | tcctcttgctactattccccct    | tcctcttgctactattccccct    | 392                | 64                   | [6]           |
|                                | <i>OmpT</i>               | atctagccgaagaaggaggc      | cccgggtcatagtgttcac       | 559                | 64                   | *             |
|                                | <i>traT</i>               | ggtgtggtgctgatgagcacag    | cacgggtcagccatccctgag     | 290                | 64                   | [6]           |
| Uropathogenic-specific protein | <i>usp</i>                | acattcacggcaagcctcag      | agcgagttcctggtgaaagc      | 440                | 64                   | [37]          |
| Aerobactin system              | <i>iutA</i>               | ggctggacatcatgggaactgg    | cgtcgggaacgggtagaatcg     | 300                | 64                   | [6]           |

\*J. R. Johnson protocols, Minneapolis VA Medical Center, MN, USA



## 189 **Antibiotic resistant genes determination**

190 Resistant genes for the various phenotypic resistant strains were determined using primers and  
191 corresponding annealing temperatures highlighted in Table 2. Each reaction mixture consisted  
192 of 4 mM MgCl<sub>2</sub>, 1 ml of 25 pmol of each primer, 2 ml of 2 mM dNTPs and 4 ml of 5 X PCR  
193 reaction buffer, 1U of Taq DNA polymerase (New England BioLab, South Africa) in a total  
194 reaction volume of 25 ml, including 2 ml DNA template. DNA amplification was carried out  
195 using the following conditions: 7 min initial denaturation at 95 °C, following 35 cycles of  
196 denaturation at 94 °C for 30 s, annealing at various temperatures for 30 s (Table 2) and  
197 extension at 72 °C for 45 s. PCR products were then electrophoresised on a 1.5% agarose gel  
198 containing ethidium bromide. The size of the various amplicons was determined by comparison  
199 with 100 bp and 1 kb ladders.

## 200 **Data handling and statistical analysis**

201 The data were entered into Microsoft Excel and analyzed using GraphPad Prism software,  
202 version 6. In all cases, P-values less than 0.05 were considered statistically significant. Initially  
203 the association between each exposure and the presence of infection was assessed using the  
204 Chi-squared test. Chi-square analysis was carried out to test for significance between  
205 prevalence of intestinal parasitic infections and risk factors for prevalence of intestinal parasitic  
206 infections. Odds ratios were computed to measure the strength of association. To determine  
207 independent risk factors for infection, logistic regression analysis was employed where  
208 appropriate.

## 209 **Ethical approval**

210 The study was approved by the Ethics Committee of the School of Biomedical and Allied  
211 Health Sciences, College of Health Sciences, University of Ghana, Legon (Ethics Identification  
212 Number: SAHS/10507884/AA/MLS/2015–2016). Participation was voluntary and written

213 consent was taken in accordance with the ethical committee's guidelines. Permission was also  
214 sought from the Volta Region Ghana Health Service, all participating Hospitals and laboratory  
215 personnel before the samples were taken.

216

217

218

219

220

221

222

223

224

225

226

227

228

229

230

231

232

233

234

235

236

237

238

239

## 240 3.0 RESULTS

### 241 3.1 Distribution of UTI and socio-demographic characteristics

242 Out of the 400 urine specimens from pregnant women in the five selected hospitals, 42.8%  
243 (171) of the pregnant women were positive for bacteriuria (growth  $>10^5$  colony forming  
244 units/mL), whilst 57.25% (229) had no significant growth. *E. coli* formed majority of the  
245 microbes associated with bacteriuria (48%), but low prevalence were found for *Staphylococcus*  
246 *aureus* (18.1%), *Klebsiella pneumoniae* (13.45%), *Proteus mirabilis* (11.11%), *Pseudomonas*  
247 *aeruginosa* (5.26%), and *Enterococcus faecalis* (4.09%) (Table 3).

248

249

250 **Table 3** Distribution of isolated bacteria in the different hospitals

251

| Hospitals        | Isolates              |                         |                            |                             |                             |                           |
|------------------|-----------------------|-------------------------|----------------------------|-----------------------------|-----------------------------|---------------------------|
|                  | <i>E. coli</i><br>(%) | <i>S. aureus</i><br>(%) | <i>P. mirabilis</i><br>(%) | <i>K. pneumoniae</i><br>(%) | <i>P. aeruginosa</i><br>(%) | <i>E. faecalis</i><br>(%) |
| St Joseph        | 23                    | 6                       | 2                          | 7                           | 2                           | 2                         |
| Volta regional   | 11                    | 6                       | 1                          | 7                           | 3                           | 0                         |
| Mary-Theresa     | 16                    | 10                      | 7                          | 4                           | 1                           | 1                         |
| Ketu South       | 18                    | 4                       | 4                          | 4                           | 3                           | 3                         |
| St Anthony Hosp. | 14                    | 5                       | 5                          | 1                           | 0                           | 1                         |
| <b>Total (%)</b> | 82(47.95)             | 31(18.13)               | 19(11.11)                  | 23(13.45)                   | 9(5.26)                     | 7(4.09)                   |

252

253

254

255

256

257

258

259

260

261

262 The educational levels of the four hundred pregnant women revealed basic level education  
263 (62.7%), and secondary education (25.5) were the common levels of education (Table 4). One  
264 hundred and ten (43.8%) of the women with basic education had UTI and 45.5% (50) were  
265 infected with *E. coli*. Forty five percent of the pregnant women with secondary education had  
266 UTI and *E. coli* was associated with 52.2% (24). Only 15 (31.9%) women with tertiary  
267 education had UTI and 8 (53.3%) of the cases of UTI was caused by *E. coli*. Despite the  
268 differences in the rate of UTI in relation to educational levels of the participant, the difference  
269 was non-significant ( $\chi^2$  (2, N = 400) = 2.678, p = 0.262).

270 For the purpose of this study, the participants were put into 4 age groups (Table 4). Occurrence  
271 of UTI among 13 - 19 age groups was found to be 44.44% and 33.33% of these UTIs were  
272 associated with *E. coli*. Out of the 228 patients (aged 20 - 29 years), 96 (42.11%) of the pregnant  
273 women were found to have UTI with 50 (52.08%) associated with *E. coli*. The rate of UTI in  
274 the 30 - 39 age groups was 42.18% and *E. coli* was associated with 50% (20 pregnant women).  
275 The age group 40 – 49 years had 9 participants (56.25%) positive bacteria growth with *E. coli*  
276 causing 33.33% of the UTI (Table 3). The differences in the rate of UTI among the various age  
277 groups was statistically non-significant ( $X^2$  (3, N = 400) = 1.397, p = 0.706).

278 Most of the pregnant women were in their third [43.3% (173)], and second [39% (156)]  
279 trimesters of pregnancy (Table 4). Significant bacteria growth of 42.3% (66) and 49.1% (85)  
280 was recorded for pregnant women in their second and third trimesters. Fifty-five per cent (11)  
281 of the significant bacteria growth recorded among first trimester group was for *E. coli*. Other  
282 cases of UTI caused by *E. coli* were found to be (53.0% (35) and 42.3% (36) respectively for  
283 second and third trimesters. Chi square exact test performed to determine the relationship  
284 between the gestational age and the development of UTI revealed a significant association with  
285 gestational age ( $X^2$  (2, N = 400) = 12.209, p = 0.002).

286 The distribution of parity of participants was 32.3% (129), 26.8% (107), and 41% (164) for  
 287 nulliparous, primiparous and multiparous respectively. *E. coli* was isolated from 22.2%, 66.7%  
 288 and 38.5% of urine samples collected from nulliparous, primiparous and multiparous pregnant  
 289 women respectively.

290 **Table 4** Socio-demographic characteristics and distribution of UTI among pregnant women

| Characteristics                            | No. of Pregnant Women Tested (%) | Culture results              |                              |                                               | $\chi^2$ | p value |
|--------------------------------------------|----------------------------------|------------------------------|------------------------------|-----------------------------------------------|----------|---------|
|                                            |                                  | No of Significant growth (%) | No. of no significant growth | No. of UTI associated with <i>E. coli</i> (%) |          |         |
| <b>AGE (years)</b>                         |                                  |                              |                              |                                               |          |         |
| 13 - 19                                    | 54 (13.5)                        | 24 (44.4)                    | 30 (55.6)                    | 8 (33.3)                                      | 1.397    | 0.706   |
| 20 - 29                                    | 228 (57.0)                       | 96 (42.1)                    | 132 (57.9)                   | 50 (52.1)                                     |          |         |
| 30 - 39                                    | 102 (25.5)                       | 42 (41.2)                    | 60 (58.8)                    | 21 (50.0)                                     |          |         |
| 40 - 49                                    | 16 (4.0)                         | 9 (56.2)                     | 7 (43.8)                     | 3 (33.3)                                      |          |         |
| <b>GESTATIONAL AGE</b>                     |                                  |                              |                              |                                               |          |         |
| 1 <sup>st</sup> Trimester                  | 71 (17.8)                        | 20 (28.2)                    | 51 (71.8)                    | 11 (55.0)                                     | 12.209   | 0.002*  |
| 2 <sup>nd</sup> Trimester                  | 156 (39.0)                       | 66 (42.3)                    | 90 (57.7)                    | 35 (53.0)                                     |          |         |
| 3 <sup>rd</sup> Trimester                  | 173 (43.3)                       | 85 (49.1)                    | 88 (50.9)                    | 36 (42.4)                                     |          |         |
| <b>PARITY</b>                              |                                  |                              |                              |                                               |          |         |
| Nulliparous                                | 129 (32.3)                       | 52 (40.3)                    | 77 (59.7)                    | 30 (57.7)                                     | 1.025    | 0.599   |
| Primiparous                                | 107 (26.8)                       | 44 (41.1)                    | 63 (58.9)                    | 18 (40.9)                                     |          |         |
| Multiparous                                | 164 (41)                         | 75 (45.7)                    | 89 (54.3)                    | 34 (45.3)                                     |          |         |
| <b>EDUCATION</b>                           |                                  |                              |                              |                                               |          |         |
| Basic Level                                | 251 (62.7)                       | 110 (43.8)                   | 141 (56.2)                   | 50 (45.5)                                     | 2.678    | 0.262   |
| Secondary                                  | 102 (25.5)                       | 46 (45.1)                    | 56 (54.9)                    | 24 (52.2)                                     |          |         |
| Tertiary                                   | 47 (11.75)                       | 15 (31.9)                    | 32 (68.1)                    | 8 (53.3)                                      |          |         |
| <b>Hospitals</b>                           |                                  |                              |                              |                                               |          |         |
| St Joseph Hospital, Nkwanta                | 80 (20.0)                        | 42 (52.5)                    | 38 (47.5)                    | 23 (54.76)                                    | 9.847    | 0.043*  |
| Volta Regional Hospital, Ho                | 80 (20.0)                        | 28 (35.0)                    | 52 (65.0)                    | 11 (39.29)                                    |          |         |
| Mary Theresa Catholic Hospital, DodiPapase | 80 (20.0)                        | 39 (48.7)                    | 41(51.3)                     | 16 (41.03)                                    |          |         |
| Ketu South Municipal Hospital, Aflao       | 80 (20.0)                        | 36 (45.0)                    | 44 (55.0)                    | 18 (50.00)                                    |          |         |
| St Anthony Hospital, Dzodze                | 80 (20.0)                        | 26 (32.5)                    | 54 (67.5)                    | 14 (53.84)                                    |          |         |
| <b>Total</b>                               | <b>400 (100.0)</b>               | <b>171 (42.8)</b>            | <b>229 (57.2)</b>            | <b>82 (47.95)</b>                             |          |         |

291

292 \*Significant at <0.005

293

294

295

### 3.2 Antimicrobial susceptibility pattern of *E. coli* isolates

The 82 *E. coli* isolates from the pregnant women revealed high resistance to ampicillin (Table 5). A resistant prevalence of 86.96%, 72.7%, 68.8%, 88.2% and 78.6% to *E. coli* isolates from St Joseph hospital, Volta regional hospital, Mary Theresa Hospital, Ketu south Municipal hospital and St Anthony hospital respectively was found. *E. coli* however recorded the least resistance of 26.09%, 27.27%, 18.75% and 21.43% to Cefuroxime for isolates collected from St Joseph hospital, Volta regional hospital, Mary Theresa Hospital and St Anthony hospital respectively. A relatively high resistance of 70.59% for cefuroxime to *E. coli* isolates was observed in Ketu South hospital, Aflao (Table 5). Resistance of 78.26%, 72.73%, 62.50%, 70.59% and 71.41% were recorded against Tetracycline for *E. coli* isolates from patients attending St Joseph hospital, Volta regional hospital, Mary Theresa Hospital, Ketu south Municipal hospital and St Anthony hospital (Table 5). Similarly, at the St Joseph hospital, 69.57%, 34.78%, 30.43%, and 26.09% of *E. coli* isolates were resistance to Cotrimoxazole, Nalidixic acid, Nitrofurantoin and Gentamicin respectively. Whilst at Volta regional hospital, 54.55% of the *E. coli* isolates were resistant to Cotrimoxazole and Nalidixic acid. Resistance to Nitrofurantoin and Gentamicin was found to be 36.36%.

312

313 **Table 5** Antibiotic resistance pattern of *E. coli* from five hospitals in the Volta region, Ghana.

314

| ANTIBIOTIC            | HOSPITALS (No.)                 |                                      |                                    |                                       |                                  |                    |
|-----------------------|---------------------------------|--------------------------------------|------------------------------------|---------------------------------------|----------------------------------|--------------------|
|                       | St Joseph hospital<br>(n=23, %) | Volta regional hospital<br>(n=11, %) | Mary Theresa hospital<br>(n=16, %) | Ketu south Mun. Hospital<br>(n=18, %) | St Anthony hospital<br>(n=14, %) | Total<br>(n=82, %) |
| <b>Ampicillin</b>     | 20 (86.96)                      | 8 (72.73)                            | 11 (68.75)                         | 15 (88.24)                            | 11 (78.57)                       | 65 (79.3)          |
| <b>Tetracycline</b>   | 18 (78.26)                      | 8 (72.73)                            | 10 (62.50)                         | 12 (70.59)                            | 10 (71.43)                       | 58 (70.7)          |
| <b>Cotrimoxazole</b>  | 16 (69.57)                      | 6 (54.55)                            | 8 (50.00)                          | 9 (52.94)                             | 10 (71.43)                       | 49 (59.8)          |
| <b>Nalidixic Acid</b> | 8 (34.78)                       | 6 (54.55)                            | 8 (50.00)                          | 11 (64.71)                            | 7 (50.00)                        | 40 (48.8)          |
| <b>Nitrofurantoin</b> | 7 (30.43)                       | 4 (36.36)                            | 5 (31.25)                          | 9 (52.94)                             | 4 (28.57)                        | 29 (35.4)          |
| <b>Gentamicin</b>     | 6 (26.09)                       | 4 (36.36)                            | 6 (37.5)                           | 10 (58.82)                            | 8 (57.14)                        | 34 (41.5)          |
| <b>Cefuroxime</b>     | 6 (26.09)                       | 3 (27.27)                            | 3 (18.75)                          | 12 (70.59)                            | 3 (21.43)                        | 27 (32.9)          |

315

316

### 317 **3.4 Prevalence of Antibiotic Resistant Genes and integrons in the**

#### 318 ***E. coli* isolates**

319 In total, forty seven ampicillin resistant isolates were found to contain *Bla*<sub>TEM</sub> (Table 6).  
320 Pregnant women in the 2<sup>nd</sup> (24 isolates) and 3<sup>rd</sup> (18 isolates) trimesters had *E. coli* isolates with  
321 more *Bla*<sub>TEM</sub> gene compared to women in their 1<sup>st</sup> trimesters (5 isolates). The aminoglycoside  
322 genes *aph(3)-Ia*(*aphA2*) for gentamicin resistance was found in only 6 phenotypically resistant  
323 isolates from 6 pregnant women in their 2<sup>nd</sup> and 3<sup>rd</sup> Trimesters (Table 6). All the *E. coli* isolates  
324 were screened for the presence of *intI* and *intII*, however only 10 of isolates were positive for  
325 *intI*, whilst 2 *E. coli* isolates contained *intII*, 58 of the isolates did not possess either *intI* or  
326 *intII*.

#### 327 **3.5 Distribution of Virulence factors gene**

328 The distribution of the 82 *E. coli* isolates in relation to virulence genes from the various groups  
329 of pregnant women revealed 75.6% (62 isolates) *E. coli* contained two or more virulence genes  
330 (VFs) (Table 6). The virulence score used to classify the ExPEC isolates was calculated using  
331 the total number of VFs genes. Isolates were classified as ExPEC if they were positive for two  
332 or more of the tested virulence genes (5). The *iutA* (aerobactin acquisition), *papC* and *iha*  
333 (adhesins), *fyuA* and *irp2* (iron capture systems), *traT* (protectins) were the common detected  
334 genes, whereas *usp* (uropathogenic-specific proteins) and some of the adhesin genes (*hra*, *ibeA*,  
335 & *papG1*) were the least detected genes, *sat* (toxins) and *papGII* & *papGIII* (adhesion) was not  
336 detected in any of the isolates. In addition, VFs was more widespread in pregnant women in  
337 the 2<sup>nd</sup> (30 isolates) and 3<sup>rd</sup> (25 isolates) trimesters than 1<sup>st</sup> trimester (12 isolates).

338 In the tested pregnant women, all the *E. coli* isolates in pregnant women in the 1<sup>st</sup> Trimester  
339 were ExPEC isolates. Although pregnant women aged between 20 - 29 years were more  
340 positive compared to women aged between 13-19 years and 30 -39 years, pregnant women in

341 their 2<sup>nd</sup> trimesters aged between 20 -29 years (21 patients) had a higher prevalence of VFs.  
342 Out the 33 VFs positive *E. coli* isolates associated with pregnant women in their 2<sup>nd</sup> trimester,  
343 30 of the strains were positive for two or more of the tested virulence genes. Whilst a few (2)  
344 pregnant women aged 40 - 49 in their 3<sup>rd</sup> trimesters harboured ExPEC isolates, 12 of the women  
345 aged between 20 -29 were positive for ExPEC isolates.

346

347

348

349

350

351

352

353

354

355

356

357

358

359





## 362 **4.0 DISCUSSION**

363 There are few studies on the antimicrobial susceptibility and/or virulence of *E. coli* isolates  
364 colonizing the genital tract of pregnant women [39, 40, 41]. However, no studies have been  
365 carried out to systematically compare virulence factors and antimicrobial resistance in *E. coli*  
366 isolates from pregnant women in different trimesters in Ghana.

367 This study revealed 42.75% of the 400 sampled pregnant women had UTI. This prevalence  
368 (42.75%) is slightly lower than the 56.5% prevalence reported in a previous study in Ghana in  
369 Cape Coast by Alex *et al.*, [42] in 200 asymptomatic pregnant women. Although finding in this  
370 study are quite similar to 47.5% by Okonko *et al.*, [43] in Nigeria, it is lower than the 85%  
371 prevalence reported in Edo state, Nigeria by Turay *et al.*, [44]. However, the prevalence of  
372 42.75 reported in this study is higher compared to the 7.3% reported in Kumasi by Turpin *et*  
373 *al.*, [45], 5.1% by Lumbiganon *et al.*, [46] in Thailand and 18.8% prevalence of UTI in  
374 Southern Ethiopia [47]. The difference in the prevalence in the different countries can be  
375 attributed to varied genital hygiene and socioeconomic conditions [48].

376 *E. coli* accounted for 47.95% of the UTI cases recorded in this study. This is in conformity  
377 with previous studies by Hamdan *et al.*, [49] in Sudan, Kawser *et al.*, [50] in Bangladesh, Akobi  
378 *et al.*, [51] in Nigeria and Alex *et al.*, [42] in Ghana that *E. coli* is the major cause of UTI in  
379 pregnancy. The high incidence of *E. coli* associated with UTI among the pregnant women can  
380 be attributed to poor genital hygiene practices that enable movement of *E. coli* from its natural  
381 habitats into the genitals [52].

382 The predominance of *Staphylococcus aureus* (18.13%) over *Klebsiella pneumoniae* (13.45%)  
383 in this study is in contrast to Alex *et al.*, [42] study which reported *Klebsiella pneumoniae* as  
384 the second prevalent among asymptomatic pregnant women. This result can be attributed to  
385 varying social, biological and environmental factors which facilitate host system diversity in

386 different countries [52]. The high numbers of *Staphylococcus aureus* in this study may suggest  
387 that *Staphylococcus aureus* is gaining clinical grounds as one of the common etiological agent  
388 of UTI in pregnancy and further studies are required to validate the its potential to cause  
389 infectious diseases in pregnancy.

#### 390 **4.1 Socio-demographic characteristics and UTI among pregnant** 391 **women**

392 Many socio-demographic factors are known to affect the frequency of bacteriuria during  
393 pregnancy [53]. These factors can include multiparity, gestational age, previous medical  
394 history of UTI, diabetes mellitus and anatomic urinary tract abnormalities [53, 54].

395 This study revealed that participants in 40 – 49 age group had the highest UTI prevalence of  
396 56.25% whilst the least incidence was 41.18% in 30 – 39 age group. Although statistical  
397 analysis revealed no significant differences in age groups and occurrence of UTI, findings from  
398 this study are in contrast to Sheerin [52] study which reported UTI development to be directly  
399 proportional to the age of the participants. Other underlying factors like personal hygiene and  
400 differences in levels of sexual activity among the various age groups may have affected the  
401 propensity to develop UTI in the tested pregnant women [52].

402 Pregnant women in their third trimester in this study recorded the highest incidence of UTI  
403 (49.13%), followed by those in their second trimester (43.25%). Finding are conformity with  
404 Kawser *et al.*, [50], Ferede *et al.*, [56], Al-Haddad [57], and Sibi *et al.*, [58] studies from  
405 Bangladesh, Ethiopia, Yemen, and India which reported that prevalence of UTI occurs with  
406 increase in gestational age. Although Chi square exact test analysis revealed a statistical  
407 association ( $p = 0.002$ ) of prevalence of UTI and gestational age in this study. Findings  
408 however are in contrast to studies by Turay *et al.*, [44] and Onuh *et al.*, [21] from Nigeria and

409 Alex *et al.*, [42] in Ghana which reported a higher prevalence of UTI in the second trimester  
410 compared to the third trimester.

411 The prevalence of UTI was found to increase with parity in this study, though the difference  
412 observed in this study was found to be non-significant ( $p = 0.599$ ). Multiparous pregnant  
413 women had the highest incidence of UTI with 45.12%, and this was followed by 42.06% and  
414 40.31% for primiparous and nulliparous pregnant women respectively. This finding however,  
415 are in contrast to findings by Emiru *et al.*, [53] and Nandy *et al.*, [59] that increase in parity is  
416 directly proportion to increase in susceptibility to UTI.

417 Although a chi square exact test revealed no significant association between educational level  
418 and development of UTI in pregnancy ( $p = 0.262$ ), pregnant women with secondary education  
419 (45.1%) and basic level of education (43.8%) were positive for bacteriuria. The changes in the  
420 rate of UTI among the participants in various level of education may be as result of varying  
421 levels of health education on personal hygiene practices; however our findings are similar to  
422 Emiru *et al.*, [53] study in Ethiopia.

## 423 **4.2 Phenotypic antimicrobial resistance and resistant genes**

424 In this study, *E. coli* isolates were found to have high antimicrobial resistance against  
425 Ampicillin, Tetracyclines, and Cotrimoxazole. These prevalences are similar to earlier report  
426 by Newman *et al.*, [22], Feglo [60] and Newman *et al.*, [60] in Ghana. This high level of  
427 resistance observed in this study can be attributed to abuse of these drugs over the years. This  
428 is because they are relatively cheap and easily accessible without prescription [22, 61].  
429 Although most of the *E. coli* isolates were susceptible to cefuroxime (33.33%). This finding  
430 however contradict Okonko *et al.*, [43] study which reported higher resistance of *E. coli* to  
431 Cephalosporins than Quinolone/ Fluoroquinolones. The difference in the findings can be  
432 attributed to differences in geographical locations with varying levels of exposure to

433 antibiotics. Although no significant differences was recorded between the antimicrobial  
434 resistances from the selected facilities in the Volta region, the difference in resistance pattern  
435 of the *E. coli* isolates in the different hospitals may be due to environmental factors, societal  
436 factors including and indiscriminate use of antibiotics among the general populace [22])

### 437 **4.3 Prevalence of Virulence factors genes and antibiotic resistant** 438 **genes**

439 We recognised a considerable number of the bacteria harboured the *iutA* (aerobactin  
440 acquisition), *papC* and *iha* (adhesins), *fyuA* and *irp2* (iron capture systems), *traT* genes [62,  
441 63]. In contrast to Sáez-López *et al.*, [41] study with pregnant women, the ExPEC isolates in  
442 this study showed high antimicrobial resistance as previously reported in studies in some  
443 African countries [64, 65]. In addition, the ampicillin-resistant ExPEC isolates containing  
444 *Bla<sub>TEM</sub>* gene showed a greater number of VFs in comparison with tetracycline or gentamicin  
445 resistant isolates, being highly significant for *iutA*, *irp*, *traT*, and *ihA*. Whilst our findings are  
446 similar to Sáez-López *et al.*, [41] study which evaluated *E. coli* colonizing the vagina and  
447 causing obstetric infection in pregnant women in Barcelona, it is dissimilar to Ramos *et al.*,  
448 [66] study with *E. coli* causing UTI in pregnant women in Sweden, Uganda, and Vietnam. The  
449 differences in the studies may be due to varying geographical area, host physiological changes  
450 or susceptibility to *E. coli* isolates with pathogenic islands containing VFs.

451

452

453

454

## 455 **5.0 Conclusion**

456 In conclusion, our results demonstrate that the ability to adhere, invade and utilize the iron  
457 acquisition systems are important for antibiotic resistant ExPEC isolates that are associated  
458 with UTI in Ghanaian pregnant women. Whilst treating UTI infections in pregnant women in  
459 low income countries can be challenging due increasing resistance to first line drugs, extensive  
460 use and misuse of antibiotics [22], the appropriate empiric treatment and clinical management  
461 of pregnant women is mandatory to provide the appropriate interventions to avoid the  
462 aetiological link between maternal symptomatic or asymptomatic carriage of pathogens with  
463 obstetric infections. Considering the involvement of extra-intestinal *E. coli* in infections, our  
464 results may be helpful to develop strategies to prevent maternal and/ neonatal infections.

## 465 **Limitations**

466 One limitation of the present study is that it focused on asymptomatic infection rather  
467 symptomatic infection and included only five hospitals from different locations of a single  
468 Region in Ghana, thereby not allowing extrapolation of our results to other Regions in country  
469 or other African countries. However, this is the first study to characterize VFs gene and  
470 resistant genes in *E. coli* isolates from pregnant women in the country. Furthermore, we were  
471 unable to follow up the pregnant patients to determine outcome of treatment of asymptomatic  
472 infection on maternal and neonatal health.

## 473 **Acknowledgments**

474 The authors would like to express their gratitude to all the staff of St Joseph, Volta regional,  
475 Mary-Theresa, Ketu South and St Anthony Hospitals and all the pregnant women for their  
476 cooperation and support during the various aspects of the study. Special thanks to Dr. James  
477 R. Johnson, Adam L. Stell and Brian Johnston of the University of Minnesota, Department of  
478 Medicine and Infectious Diseases for providing the positive controls for the virulence factors.

## 479 **Availability of data and materials section**

480 The datasets used and/or analyzed during the current study are available from the  
481 corresponding author on reasonable request.

## 482 **Funding**

483 This research received no specific grant from any funding agency in the public, commercial,  
484 or not-for-profit sectors.

## 485 **Consent for publication**

486 Not applicable

## 487 **Competing interests**

488 The authors declare that no competing interests exist.

489  
490  
491  
492  
493  
494  
495  
496  
497  
498  
499  
500  
501  
502  
503  
504  
505  
506  
507  
508  
509  
510  
511  
512  
513  
514  
515  
516



## 517 **References**

- 518 1. Gilbert N. M., O'Brien V. P., Scott Hultgren, Macones G., Lewis W. G., Lewis A. L.  
519 (2013). Urinary Tract Infection as a Preventable Cause of Pregnancy Complications:  
520 Opportunities, Challenges, and a Global Call to Action. *Global Advances in Health and*  
521 *Medicine*, 2 (5):59-69.
- 522 2. Ayub M., Amir J. S., Firdous K., et al. (2016). E. coli the Most Prevalent Causative  
523 Agent Urinary Tract Infection in Pregnancy: Comparative Analysis of Susceptibility and  
524 Resistance Pattern of Antimicrobials. *Archives of Clinical Microbiology*, 7:4.  
525 doi:10.4172/1989-8436.100054.
- 526 3. Sabir S., Anjum A. A., Ijaz T., Ali M. A., Khan M. R., Nawaz M. (2014). Isolation and  
527 antibiotic susceptibility of E. coli from urinary tract infections in a tertiary care hospital.  
528 *Pakistan Journal of Medical Sciences*, 30(2):389-392. 4. Farshad S., Anvarinejad M.,  
529 Tavana A. M., Ranjbar R., Japoni A., Zadegan R. M., Alborzi, A (2011), 'Molecular  
530 epidemiology of Escherichia coli strains isolated from children with community acquired  
531 urinary tract infections. *African Journal of Microbiology Research*, 5(26): 4476 - 4483.
- 532 5. Russo, T. A. & Johnson, J. R. (2009), 'Extraintestinal Pathogenic *Escherichia coli*', In  
533 Alan, DTB & Lawrence, RS, Vaccines for Biodefense and Emerging and Neglected Diseases,  
534 Academic Press, London, pg. 939-961.
- 535 6. Johnson, J. R. & Stell, A. L. (2000). 'Extended virulence genotypes of *Escherichia coli*  
536 strains from patients with urosepsis in relation to phylogeny and host compromise. *Journal of*  
537 *Infectious Diseases*, 181 (1): 261 - 272.
- 538 7. Belanger L., Garenaux A., Harel J., Boulianne M., Nadeau E. & Dozois, C. M.(2011).  
539 *Escherichia coli* from animal reservoirs as a potential source of human extraintestinal  
540 pathogenic *E. coli*', *FEMS Immunology and Medical Microbiology*, 62 (1): 1 - 10.
- 541 8. Kohler C. D. & Dobrindt U. (2011). 'What defines extraintestinal pathogenic  
542 *Escherichia coli*? *International Journal of Medical Microbiology*, 301 (8), pp. 642 - 647.
- 543 9. Johnson J. R. & Russo T. A. (2002). 'Extraintestinal pathogenic *Escherichia coli*: 'The  
544 other bad *E. coli*', *Journal of Laboratory and Clinical Medicine*, 139 (3): 155 - 162.
- 545 10. Graziani C., Luzzi I., Corro M., Tomei F., Parisi G., Giufre M., Morabito S., Caprioli  
546 A. & Cerquetti M. (2009). 'Phylogenetic background and virulence genotype of ciprofloxacin-  
547 susceptible and ciprofloxacin-resistant *Escherichia coli* strains of human and avian origin.  
548 *Journal of Infectious Diseases*, 199(8):1209 - 1217.
- 549 11. Johnson T.J., Wannemuehler Y., Johnson S. J., Stell A. L., Doetkott C., Johnson J.R.,  
550 Kim K. S., Spanjaard L. & Nolan L. K. (2008). 'Comparison of extraintestinal pathogenic  
551 *Escherichia coli* strains from human and avian sources reveals a mixed subset representing  
552 potential zoonotic pathogens. *Applied and Environmental Microbiology*, 74 (22): 7043 - 7050.
- 553 12. Ramos N. L., Saayman M. L., Chapman T. A., Tucker J. R., Smith H. V., Faoagali J.,  
554 et al.(2010). Genetic relatedness and virulence gene profiles of *Escherichia coli* strains isolated  
555 from septicaemic and uroseptic patients. *European Journal of Clinical Microbiology &*  
556 *Infectious Diseases*, 29:15-23.
- 557 13. Matuszkiewicz-Rowińska J., Małyszko J., Wieliczko M. (2015). Urinary tract  
558 infections in pregnancy: old and new unresolved diagnostic and therapeutic problems, *Archives*  
559 *of Medical Science*, 11(1): 67–77.
- 560 14. McNally A., Alhashash F., Collins M., Alqasim A., Paszckiewicz K., Weston V. and  
561 Diggle M. (2013) Genomic analysis of extra-intestinal pathogenic *Escherichia coli* urosepsis.  
562 *Clinical Microbiology and Infection*, 19: E328–E334.
- 563 15. Salipante S. J., Roach D. J., Kitzman, Snyder M. W., Stackhouse B., Butler-Wu S. M.,  
564 Lee C., Cookson B. T., Shendure J. (2014). Large-scale genomic sequencing of extraintestinal  
565 pathogenic *Escherichia coli* strains. *Genome Research*, 25:119–128.



- 566 16. World Health Organization Media Release: WHO's first global report on antibiotic  
567 resistance reveals serious, worldwide threat to public health, Source:  
568 <http://www.who.int/mediacentre/news/releases/2014/amr-report/en>, accessed: 6/25/2014
- 569 17. Gilbert N. M., O'Brien V. P., Scott Hultgren, Macones G., Lewis W. G., Lewis A. L.  
570 (2013). Urinary Tract Infection as a Preventable Cause of Pregnancy Complications:  
571 Opportunities, Challenges, and a Global Call to Action. *Global Advances in Health and*  
572 *Medicine*, 2 (5): 59-69.
- 573 18. Mukherjee M., Koley S., Mukherjee S., Basu S., Ghosh B., Chakraborty S. (2015).  
574 Phylogenetic background of *E. coli* isolated from asymptomatic pregnant women from  
575 Kolkata, *The Journal of Infection in Developing Countries*, 9(7): 720-724.
- 576 19. Al-Mayahie S.M. (2013). Phenotypic and genotypic comparison of ESBL production  
577 by vaginal *Escherichia coli* isolates from pregnant and non-pregnant women. *Annals of*  
578 *Clinical Microbiology and Antimicrobials*. 25; 12:7. doi: 10.1186/1476-0711-12-7.
- 579 20. Alemu A., Moges F., Shiferaw Y., Tafess K., Kassu A., Anagaw B., and Agegn A.  
580 (2012). Bacterial profile and drug susceptibility pattern of urinary tract infection in pregnant  
581 women at University of Gondar Teaching Hospital, Northwest Ethiopia. *BMC Research Notes*,  
582 5:197.
- 583 21. Onoh R. C., Umeora O. U. J., Egwuatu V. E., Ezeonu P. O., & Onoh T. J. P. (2013).  
584 Antibiotic sensitivity pattern of Uropathogens from pregnant women with urinary tract  
585 infection in Abakaliki, Nigeria. *Infection and Drug Resistance*, 6; 225–233.
- 586 22. Newman M. J., Frimpong E., Donkor E. S., Opintan J. A., Asamoah-Adu A. (2011)  
587 Resistance to antimicrobial drugs in Ghana. *Infection and Drug Resistance*, 4: 215 – 220.
- 588 23. Donkor E. S., Akumwena A., Amoo K. P., Owolabi M. O., Aspelund T, Gudnason V.  
589 (2016). Post-stroke bacteriuria among stroke patients attending a physiotherapy clinic in  
590 Ghana: a cross-sectional study. *Therapeutics and Clinical Risk Management*, 12: 457–462.
- 591 24. Donkor E. S., Osei J. A., Anim-Baidoo I., Darkwah S. (2007). Risk of Asymptomatic  
592 Bacteriuria among People with Sickle Cell Disease in Accra, Ghana. *Diseases*, 5(4)
- 593 25. Ghana Statistical Service. 2012. 2010 Population and Housing Census. Summary  
594 Report of Final Results. GSS, Accra.
- 595 26. GhanaWeb, 2018, Source:  
596 <https://www.ghanaweb.com/GhanaHomePage/general/statistics.php>
- 597 27. Japheth A Opintan, Mercy J Newman, Reuben E Arhin, Eric S Donkor, Martha  
598 Gyansa-Lutterodt, William Mills-Pappoe (2015). Laboratory-based nationwide surveillance of  
599 antimicrobial resistance in Ghana. *Infection and Drug Resistance*, 8: 379–389.
- 600 28. Cheesbrough M. (2007). District laboratory practice in tropical countries. Cambridge  
601 University Press. Part 2 pg. 71 – 140.
- 602 29. CLSI. Performance Standards for Antimicrobial Disk Diffusion Tests (2015). Approved  
603 Standard - 12<sup>th</sup> Ed. CLSI documents M02 – 12, Wayne, PA: Clinical and Laboratory Standards  
604 Institutes.
- 605 30. Johnson, J. R., et al. (2006). Experimental mouse lethality of *Escherichia coli* isolates,  
606 in relation to accessory traits, phylogenetic group, and ecological source. *Journal of Infectious*  
607 *Diseases*, 194:1141–1150.
- 608 31. Lefort A., Panhard X., Clermont O et al. (2011). Host factors and portal of entry outweigh  
609 bacterial determinants to predict the severity of *Escherichia coli* bacteraemia. *Journal of*  
610 *Clinical Microbiology*, 49: 777–783.
- 611 32. Maynard C, Bekal S., Sanschagrín F., Levesque R. C., Brousseau R., Masson L., Larivière  
612 S., Harel J. (2004) Heterogeneity among virulence and antimicrobial resistance gene

- 613 profiles of Extraintestinal *Escherichia coli* isolates of animal and human origin. *Journal of*  
614 *Clinical Microbiology*. 42 (12): 5444 - 5452.
- 615 33. Saenz Y, Brinas L, Dominguez E, Ruiz J, Zarazaga M, Vila J, Torres C. (2004)  
616 Mechanisms of resistance in multiple-antibiotic-resistant *Escherichia coli* strains of human,  
617 animal, and food origins. *Antimicrobial Agents and Chemotherapy*. 48 (10): 3996 - 4001.
- 618 34. Johnson JR, Russo TA, Tarr PI, Carlino U, Bilge SS, Vary JC. Jr, Stell AL. (2000)  
619 Molecular epidemiological and phylogenetic associations of two novel putative virulence  
620 genes, *iha* and *iroN*(*E. coli*), among *Escherichia coli* isolates from patients with urosepsis.  
621 *Infect Immun*. 68(5):3040 - 30407.
- 622
- 623 35. Johnson JR., Gajewski A, Lesse AJ, Russo TA. (2003). Extraintestinal Pathogenic  
624 *Escherichia coli* as a Cause of Invasive Non urinary Infections. *Journal of Clinical*  
625 *Microbiology*, 41(12), 5798–580.
- 626 36. Skyberg JA, Horne SM, Giddings CW, Wooley RE, Gibbs PS, Nolan LK. (2003).  
627 Characterizing avian *Escherichia coli* isolates with multiplex polymerase chain reaction.  
628 *Avian Dis*. 47: 1441–1447.
- 629
- 630 37. Bauer RJ, Zhang L, Foxman B, Siitonen A, Jantunen ME, Saxen H, Marrs CF. (2002)  
631 Molecular Epidemiology of 3 Putative Virulence Genes for *Escherichia coli* Urinary Tract  
632 Infection—*usp*, *iha*, and *iroNE*. *The Journal of Infectious Diseases*.185 (10):1521–1524.
- 633 38. Paixão AC, Ferreira AC, Fontes M, Themudo P, Albuquerque T, Soares MC, Fevereiro  
634 M, Martins L, Corrêa de Sá MI. (2016) Detection of virulence-associated genes in pathogenic  
635 and commensal avian *Escherichia coli* isolates. *Poultry Science*. 95 (7):1646–1652.
- 636 39. Guiral E, Bosch J, Vila J, Soto S M. Prevalence of *Escherichia coli* among samples  
637 collected from the genital tract in pregnant and non pregnant women: relationship with  
638 virulence. *FEMS Microbiol Lett*. 2011; 314: 170–173.
- 639 40. Watt S, Lanotte P, Mereghetti L, Moulin-schouleur M, Picard B, Quentin R. *Escherichia*  
640 *coli* Strains from Pregnant Women and Neonates: Intraspecies Genetic Distribution and  
641 Prevalence of Virulence Factors. *J. Clin. Microbiol*. 2003; 41:1929–1935.
- 642 41. Sáez-López E, Guiral E, Fernández-Orth D, Villanueva S, Goncé A, LópezM, et al.  
643 (2016) Vaginal versus Obstetric Infection *Escherichia coli* Isolates among Pregnant Women:  
644 Antimicrobial Resistance and Genetic Virulence Profile. *PLoS ONE*  
645 11(1):e0146531.doi:10.1371/journal.pone.0146531.
- 646
- 647 42. Boye A, Siakwa PM, Boampong JN, Koffuor GA, Ephraim RKD, Amoateng P, Obodai  
648 G, Penu D .(2012). Asymptomatic urinary tract infections in pregnant women attending  
649 antenatal clinic in Cape Coast, Ghana. *Journal of Medical Research*, 1(6): 74 - 83.
- 650 43. Okonko IO. Donbraye-Emmanuel OB, Ijandipe LA, Ogun AA, Adedeji AO, Udeze  
651 AO. (2009). Antibiotics Sensitivity and Resistance Patterns of Uropathogens to Nitrofurantoin  
652 and Nalidixic Acid in Pregnant Women with Urinary Tract Infections in Ibadan, Nigeria.  
653 *Middle-East Journal of Scientific Research*. 4 (2): 105-109.
- 654 44. Turay AA, Eke SO, Oleghe PO, Ozekhome MC. (2014.)The prevalence of urinary tract  
655 infections among pregnant women attending antenatal clinic at Ujoelen primary health care  
656 centre, Ekpoma, Edo state, Nigeria. *IJB AIR*, 3(1): 86 – 94.

- 657 45. Turpin C. A., Minkah B., Danso K. A., Frimpong E. H. (2007). Asymptomatic  
658 bacteriuria in pregnant women attending antenatal clinic at Komfo Anokye teaching hospital,  
659 Kumasi. *Ghana Medical Journal*. 41(1):26–9.
- 660 46. Lumbiganon P., Villar J., Laopaiboon M., Widmer M., Thinkhamrop J., Carroli G., Duc  
661 Vy N., Mignini L., Festin M., Prasertcharoensuk W., Limpongsanurak S., Liabsuetrakul T.,  
662 Sirivatanapa P. (2009). One-day compared with 7-day nitrofurantoin for asymptomatic  
663 bacteriuria in pregnancy: a randomized controlled trial. *Obstetrics and Gynecology*. 113 (2 Pt  
664 1):339-45.
- 665 47. Tadesse E., Teshome M., Merid Y., Kibret B., Shimelis T. (2014). Asymptomatic  
666 urinary tract infection among pregnant women attending the antenatal clinic of Hawassa  
667 Referral Hospital, Southern Ethiopia. *BMC Research Notes*, (7) 155.
- 668 48. Tazebew D., Getenet B., Selabat M., Wondewosen T. (2012). Urinary bacterial profile  
669 and antibiotic susceptibility pattern among pregnant women in North West Ethiopia. *Ethiopian  
670 Journal of Health Science*, 22 (2), 121-128.
- 671 49. Hamdan Z. H., Abdel Haliem M Ziad, Salah K. Ali, Ishag Adam, (2011). Epidemiology  
672 of urinary tract infections and antibiotics sensitivity among pregnant women at Khartoum  
673 North Hospital. *Annals of Clinical Microbiology and Antimicrobial*, 10:2.
- 674 50. Kawser P., Afroza M., Arzumath A. B., Monowara B, (2011) .Prevalence Of Urinary  
675 Tract Infection During Pregnancy. *Journal of Dhaka National Medical College Hospital*. 17  
676 (02): 8-12.
- 677 51. Akobi O. A., Inyinbor H. E., Akobi E. C., Emumwen E. G., Ogedengbe S.O., Uzoigwe  
678 E. O., Agbayani R. O., Emumwen E. F., Okorie I. E. (2014). Incidence of Urinary Tract  
679 Infection among Pregnant Women Attending Antenatal Clinic at Federal Medical Centre, Bida,  
680 Niger-State, North Central Nigeria. *American Journal of Infectious Diseases and  
681 Microbiology*, 2 (2): 34-38.
- 682 52. Sheerin N. S. (2015). Urinary tract infection. (Obstruction and Infection), *Medicine*, 43  
683 (8): 435 – 439.
- 684 53. Emiru T., Beyene G., Tsegaye W. and Melaku S. (2013). Associated risk factors of  
685 urinary tract infection among pregnant women at Felege Hiwot Referral Hospital, Bahir Dar,  
686 North West Ethiopia. *BMC Research Notes*, 6:292.
- 687 54. Enayat K., Fariba F, Bahram N. (2008): Asymptomatic bacteriuria among pregnant  
688 women referred to outpatient clinics in Sanandaj, Iran. *International Brazilian Journal of  
689 Urology* 34:699–707.
- 690 55. Amiri FN, Rooshan MH, & Ahmady MH. (2009): Hygiene practices and sexual activity  
691 associated with urinary tract infection in pregnant women. *East Mediterranean Health*, 15:  
692 104–110
- 693 56. Ferede G, Yismaw G, Wondimeneh Y, Sisay Z. (2012). The Prevalence and  
694 Antimicrobial Susceptibility pattern of Bacterial Uropathogens Isolated from pregnant  
695 women. *European Journal of Experimental Biology*, 2 (5):1497-1502.
- 696 57. Al-Haddad AM. (2005). Urinary tract infection among pregnant women in Al-Mukalla  
697 district, Yemen. *East Mediterranean Health Journal*. 11(3):505-510.

- 698 58. Sibi G, Kumari P. & Neema K., (2014). Antibiotic sensitivity pattern from pregnant  
699 women with urinary tract infection in Bangalore, India. *Asian Pacific Journal of Tropical*  
700 *Medicine*. 7 (Suppl 1): S116-S120.
- 701 59. Nandy P, Thakur AR, Ray CS. (2007). Characterization of bacterial strains isolated  
702 through microbial profiling of urine samples. *OnLine Journal of Biological Sciences*. 7, 44–  
703 51.
- 704 60. Feglo P. (2007). Antimicrobial sensitivity patterns of urine isolates at the Komfo-  
705 Anokye Teaching Hospital, (KATH) Kumasi, 2000-2005. *Ghana Journal of Allied Health*  
706 *Sciences*, 1(2.): 43-49.
- 707 61. Newman MJ, Frimpong E, Asamoah-Adu A., Donkor ES. Resistance to antimicrobial  
708 drugs in Ghana. *The Ghanaian-Dutch Collaboration for Health Research and Development*,  
709 2006; pp. 1-19, Source:  
710 [https://www.researchgate.net/profile/Japheth\\_Opintan/publication/221760926\\_Resistance\\_to](https://www.researchgate.net/profile/Japheth_Opintan/publication/221760926_Resistance_to_antimicrobial_drugs_in_Ghana/links/09e41502445a36821a000000/Resistance-to_antimicrobial-drugs-in-Ghana.pdf)  
711 [\\_antimicrobial\\_drugs\\_in\\_Ghana/links/09e41502445a36821a000000/Resistance-to-](https://www.researchgate.net/profile/Japheth_Opintan/publication/221760926_Resistance_to_antimicrobial_drugs_in_Ghana/links/09e41502445a36821a000000/Resistance-to_antimicrobial-drugs-in-Ghana.pdf)  
712 [antimicrobial-drugs-in-Ghana.pdf](https://www.researchgate.net/profile/Japheth_Opintan/publication/221760926_Resistance_to_antimicrobial_drugs_in_Ghana/links/09e41502445a36821a000000/Resistance-to_antimicrobial-drugs-in-Ghana.pdf)
- 713 62. Johnson JR, Delavari P, O'Bryan TT, Smith KE, Tatini, S, Contamination of retail  
714 foods, particularly Turkey, from community markets (Minnesota, 1999 - 2000) with  
715 antimicrobial-resistant and extraintestinal pathogenic *Escherichia coli*, *Foodborne Pathogens*  
716 *and Disease*; 2005, 2(1): 38 - 49.
- 717 63. Johnson JR, McCabe JS, White DG, Johnston B, Kuskowski MA, McDermott P. (2009)  
718 Molecular analysis of *Escherichia coli* from retail meats (2002-2004) from the United States  
719 national antimicrobial resistance monitoring system, *Clinical Infectious Diseases*. 49 (2): 195  
720 - 201.
- 721 64. Motayo BO, Ogiogwa IJ, Okerentugba PO, Innocent-Adiele HC, Nwanze JC, Onoh  
722 CC, et. al. (2012) Antimicrobial Resistance Profile of Extra-intestinal *Escherichia coli*  
723 Infections in a South Western Nigerian City. *J. Microbiol Res*. 2:141–144.
- 724 65. Mshana SE, Matee M, Rweyemamu M. (2013) Antimicrobial resistance in human and  
725 animal pathogens in Zambia, Democratic Republic of Congo, Mozambique and Tanzania: an  
726 urgent need of a sustainable surveillance system. *Ann. Clin. Microbiol. Antimicrob*. 12:28.
- 727 66. Ramos NL, Sekikubo M, Dzung DTN, Kosnopfel C, Kironde F, Mirembe F, Braunera  
728 A. (2012) Uropathogenic *Escherichia coli* Isolates from Pregnant Women in Different  
729 Countries. *Journal of Clinical Microbiology*. 50 (11):3569–3574

730

731

732

733

734

735

736

737

738

739

740

741

742

743

744

745
